# Supplementary material for: Ultra-small α-CsPbI3 perovskite quantum dots with stable, bright and pure red emission for Rec. 2020 display backlights
Source: Royal Society of Chemistry journal article supplement (doi:10.1039/d2nr05456f), 2022-12-07
Supplement: d2nr05456f1.pdf [file d2nr05456f1.pdf]

Electronic Supporting Information for

**Ultra-Small  $\alpha$ -CsPbI<sub>3</sub> Perovskite Quantum Dots with Stable, Bright and Pure Red Emission for Rec. 2020 Display Backlight**

*Chuying Wang<sup>a</sup>, Wen Meng<sup>a</sup>, Yacong Li<sup>a</sup>, Guangyong Xu<sup>a</sup>, Min Peng<sup>a</sup>, Shuming Nie<sup>b</sup> and Zhengtao Deng<sup>\*a</sup>*

- a. College of Engineering and Applied Sciences, State Key Laboratory of Analytical Chemistry for Life Science, National Laboratory of Micro-structures, Nanjing University, Nanjing, Jiangsu, 210023, P. R. China.*
- b. Departments of Bioengineering, Chemistry, Electrical and Computer Engineering, and Materials Science and Engineering, University of Illinois at Urbana-Champaign, Urbana, IL, 61801, USA*

## EXPERIMENTAL SECTION

**Materials.** Cesium carbonate ( $\text{Cs}_2\text{CO}_3$ , 99.9%, Aladdin), Oleic acid (OA, 85%, Aladdin, AR), Oleylamine (OAm, 80-90%, Aladdin), Lead iodide ( $\text{PbI}_2$ , 99.9%, Aladdin), Lead bromide ( $\text{PbBr}_2$ , 99.9%, Aladdin), Zinc Iodide ( $\text{ZnI}_2$ , 98%, Macklin), Manganese acetate tetrahydrate ( $\text{MnC}_4\text{H}_6\text{O}_4 \cdot 4\text{H}_2\text{O}$ , 99.0%, Aladdin), 1-Iodopyrrolidine-2,5-dione (NIS, 98%, Bidepharmatech), Lauryl methacrylate (LMA, 85%, supplied by Thunway New Materials Technology Co., Ltd., Nanjing, China), 1-Octadecene (ODE, 90%, Aladdin), Hexane (AR, Sinopharm Chemical Reagent Co. Ltd), 2-Ethylhexanoic acid (EHA, 99.0%, Macklin), Toluene (99.9%, Sinopharm Chemical Reagent Co. Ltd), Methyl acetate ( $\geq 99.0\%$ , Macklin), 2,2-dimethoxy-2-phenylacetophenone (DMPA, 99%, Aladdin), polyester polyurethane acrylates oligomer (45 wt %, supplied by Thunway New Materials Technology Co., Ltd., Nanjing, China), and isobornyl acrylate (IBOA,  $>85\%$ , Nippon Shokubai Co., Ltd, Japan). All chemicals were used as received without any further purification.

**Synthesis of CsPbI<sub>3</sub> QDs in ODE.** 8 mL oleic acid, 8 mL oleylamine, 1 mL EHA, 16 mL ODE, 640 mg  $\text{PbI}_2$ , 640 mg  $\text{ZnI}_2$ , 640 mg  $\text{MnC}_4\text{H}_6\text{O}_4 \cdot 4\text{H}_2\text{O}$  and 608 mg NIS were loaded into a 100 mL three-necked round-bottom flask and degassed. The solution was heated up to dissolve the precursors and kept at 110 °C for 15 min under vacuum. The temperature was then elevated to 120 °C and 1.5 mL of Cs-OA precursor prepared followed the previous protocol<sup>[32]</sup> was swiftly injected under vigorous stirring. After 5 minutes, the crude mixture was cooled down and centrifuged at 10000 rpm for 20 minutes for QD-polymer composite films.

**Synthesis of CsPbI<sub>3</sub> QDs in LMA.** 8 mL oleic acid, 8 mL oleylamine, 1 mL EHA, certain amount of LMA (6 mL~16 mL), 640 mg  $\text{PbI}_2$ , 640 mg  $\text{ZnI}_2$ , certain amount of  $\text{MnC}_4\text{H}_6\text{O}_4 \cdot 4\text{H}_2\text{O}$  (corresponding to the feed ratio in manuscript) and 608 mg NIS were loaded into a 100 mL three-necked round-bottom flask and degassed. The solution was heated up to dissolve the precursors and kept at 110 °C for 15 min under vacuum. The temperature was then elevated to 120 °C and 1.5 mL of as-prepared Cs-OA precursor was swiftly injected under vigorous stirring. After 5 minutes, the crude mixture was cooled down. For purification, the supernatant was mixed with methyl acetate at the volume ratio of 1:4 and centrifuged at 10000 rpm for

20 minutes for QD-polymer composite films. This synthesis could be scaled up to 10 times in a 1000 mL three-necked round-bottom flask to obtain 250 mL product.

**Synthesis of CsPbBr<sub>2</sub> QDs.** 10 mL oleic acid, 10 mL oleylamine, 15 mL ODE, 1.1 g PbI<sub>2</sub> and 580 mg PbBr<sub>2</sub> were loaded into a 100 mL three-necked round-bottom flask and degassed. The solution was heated up to dissolve the precursors and kept at 110 °C for 15 min under vacuum. The temperature was then elevated to 120 °C and 1.5 mL of as-prepared Cs-OA precursor was swiftly injected under vigorous stirring. After keeping for 5 minutes, the crude mixture was cooled down and centrifuged at 10000 rpm for 20 minutes for QD-polymer composite films.

**Scale-up Synthesis of CsPbI<sub>3</sub> QDs in LMA.** 80 mL oleic acid, 80 mL oleylamine, 10 mL EHA, 80 mL LMA, 6.40 g PbI<sub>2</sub>, 6.40 g ZnI<sub>2</sub>, 5.87g MnC<sub>4</sub>H<sub>6</sub>O<sub>4</sub>•4H<sub>2</sub>O and 6.08 g NIS were loaded into a 1L three-necked round-bottom flask and degassed. The solution was heated up to dissolve the precursors and kept at 110 °C for 30 min under vacuum. The temperature was then elevated to 120 °C and 15 mL of as-prepared Cs-OA precursor was swiftly injected under vigorous stirring. After 5 minutes, the crude mixture was cooled down by ice-water bath.

**Fabrication of the CsPbI<sub>3</sub> QD-Polymer Composite Films.** 1 g LMA solution containing QDs and 10 g adhesive containing a certain amount of polyester polyurethane acrylate oligomer, monomer (IBOA), and initiator (DMPA) were first stirred and mixed fully, then coated onto a transparent PET (Polyethylene Terephthalate) substrate using a doctor blade technique as shown in our previous report.<sup>[21]</sup> finally a bright red emission polymer film with a thickness of  $150 \pm 5 \mu\text{m}$  was obtained by UV light polymerization for 5 minutes. The control films were processed using a similar process.

**Characterization Details.** Ultraviolet and visible (UV-vis) absorption spectra were measured by Shimadzu UV-3600 plus spectrophotometer at room temperature. PL spectra were measured by Horiba PTI QuantaMaster 400. Transmission electron microscopy (TEM) images were measured by JEOL JEM-2800 and

FEI Tecnai G2 F20 electron microscope operating at 200 kV. X-ray diffraction (XRD) measurements were measured through Rigaku Ultima III X-ray diffractometer equipped with Cu K $\alpha$  radiation ( $\lambda=1.541841\text{\AA}$ ). The fluorescence decay processes were recorded with time-correlated single-photon counting (TCSPC) technique on a system provided by a SOL confotec MR200 micro-PL-Lifetime and Raman system equipped with a 450 nm laser and a time-correlated single-photon counting system at room temperature. The absolute fluorescence quantum yields were measured using a Horiba PTI QuantaMaster 400 steady-state fluorescence system with an integrated sphere. Three independent experiments on three independent areas of the films are done for better evaluation.

**Table S1.** Compositional analysis of samples with different conditions characterized by XPS.

| Amount of LMA       | 8 mL | 16 mL | 16 mL |
|---------------------|------|-------|-------|
| Feed ratio of Mn/Pb | 1.6  | 1.7   | 1.7   |
| Cs                  | 0.13 | 0.11  | 0.31  |
| Pb                  | 0.10 | 0.10  | 0.11  |
| Mn                  | 0.09 | 0.08  | /     |
| I                   | 0.68 | 0.71  | 0.54  |
| Mn/Pb               | 0.90 | 0.85  | /     |

Time-resolved PL decay curves of CsPbI<sub>3</sub> NCs-polymer composites film were fitted by a triexponential function (see eqs 1):

$$A(t) = A_0 + A_1 \exp -(t - t_0)/\tau_1 + A_2 \exp -(t - t_0)/\tau_2 + A_3 \exp -(t - t_0)/\tau_3$$

(eqs 1);

The average lifetimes were calculated using

$$\tau_{ave} = (A_1\tau_1^2 + A_2\tau_2^2 + A_3\tau_3^2)/(A_1\tau_1 + A_2\tau_2 + A_3\tau_3)$$

(eqs 2).

**Table S2.** The PL lifetimes ( $\tau_{avg}$ ) CsPbI<sub>3</sub> QDs with different feed ratio of Mn/Pb.

| Feed ratio of Mn/Pb | 1.5      | 1.6      | 1.7     |
|---------------------|----------|----------|---------|
| A <sub>1</sub>      | 18063.69 | 13642.10 | 6632.00 |
| $\tau_1$ (ns)       | 8.91     | 9.20     | 7.17    |
| A <sub>2</sub>      | 233.16   | 2045.50  | 4126.52 |
| $\tau_2$ (ns)       | 25.65    | 15.30    | 12.35   |
| A <sub>3</sub>      | 10880.76 | /        | 1291.13 |
| $\tau_3$ (ns)       | 2.69     | /        | 2.39    |
| $\tau_{avg}$        | 8.49     | 10.45    | 9.63    |

(a)

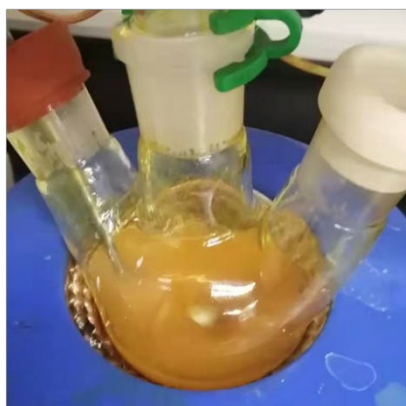

(b)

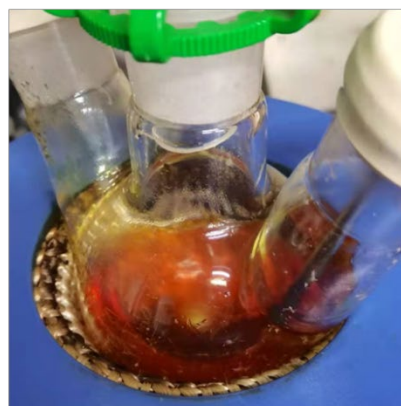

**Fig. S1** Photo images of CsPbI<sub>3</sub> QDs synthesized in (a) ODE and (b) LMA at the same reaction condition.

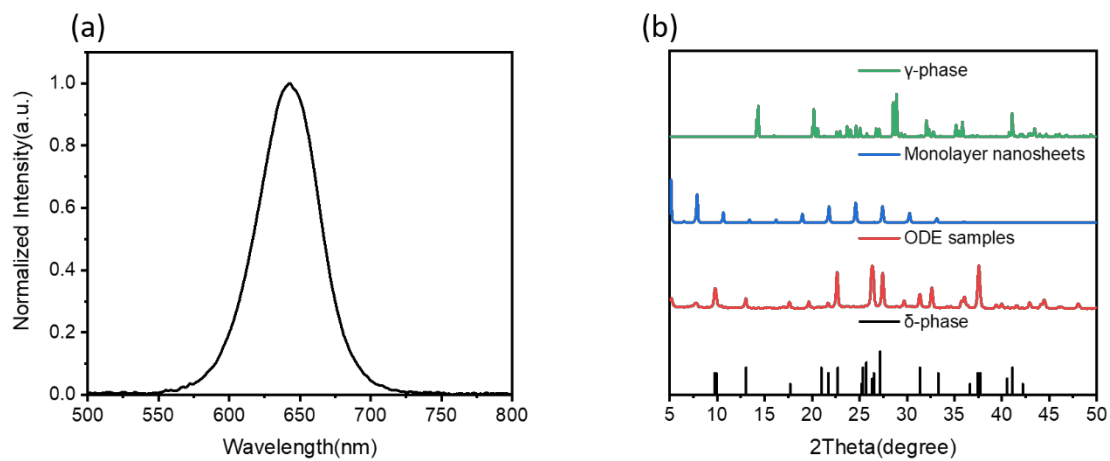

**Fig. S2** (a) PL spectrum of CsPbI<sub>3</sub> QDs obtained by ODE. (b) XRD pattern of precipitate of ODE solution after stored for 2 days.



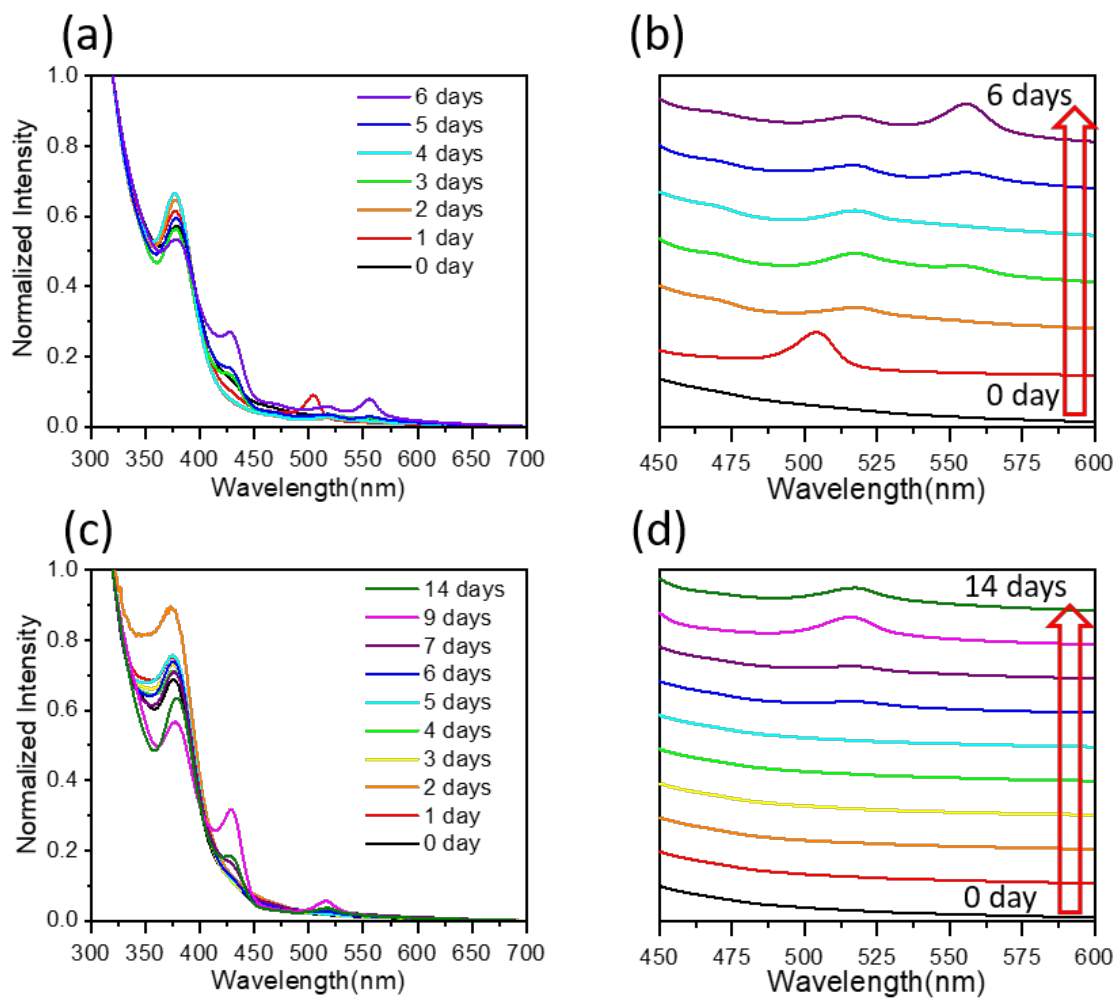

**Fig. S3** Comparisons between CsPbI<sub>3</sub> QDs in ODE and LMA. Absorption spectra of CsPbI<sub>3</sub> QDs stored in pristine solution of (a)(b) ODE and (c)(d) LMA for different days without further purification.

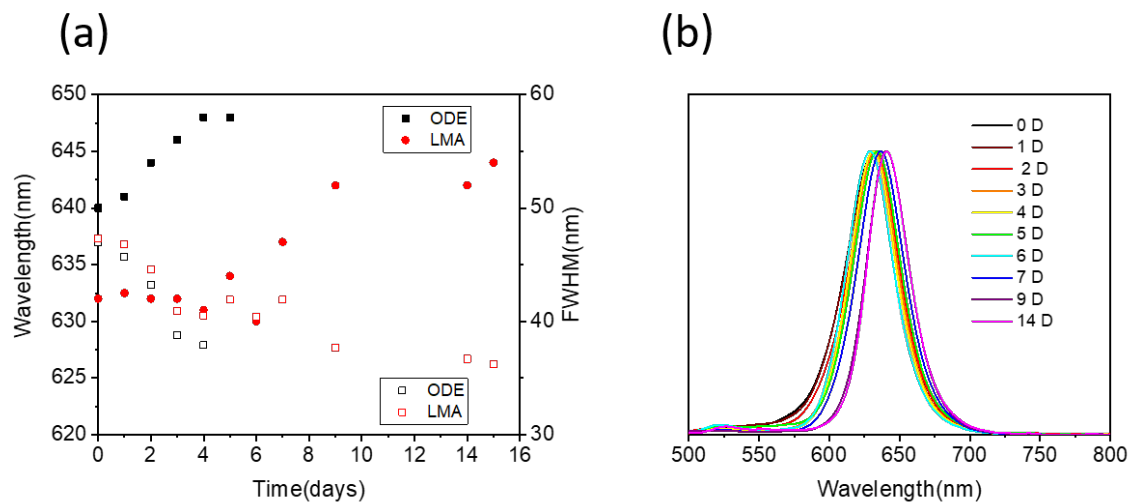

**Fig. S4** (a) Comparisons between CsPbI<sub>3</sub> QDs in ODE and LMA and (b) PL spectra of pristine CsPbI<sub>3</sub> QDs in LMA with different preservation time.

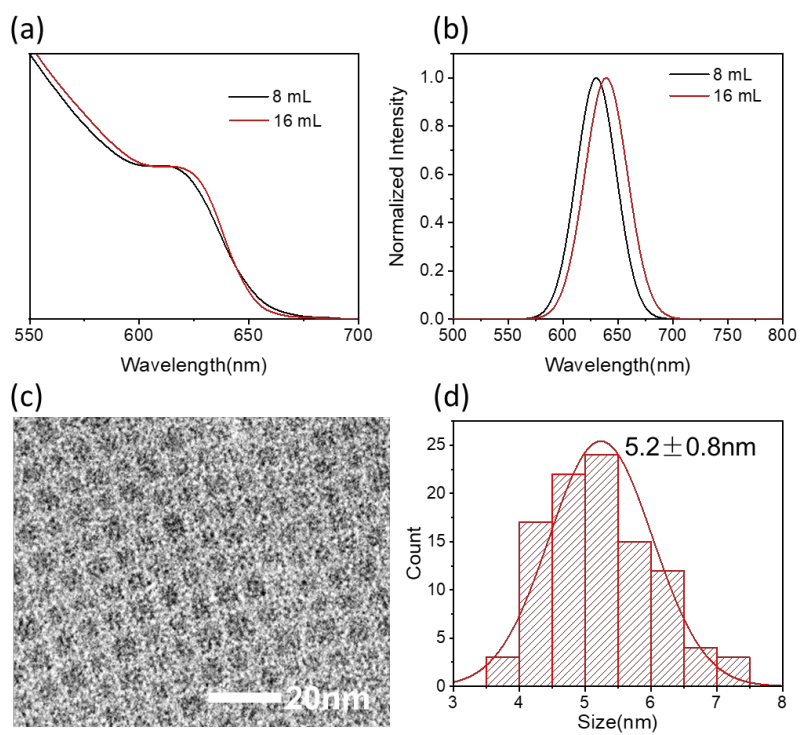

**Fig. S5** (a) Absorption and (b) PL emission spectra of CsPbI<sub>3</sub> QD solution diluted in toluene. (c) TEM image and (d) size distribution of QDs synthesized through condition of 16 mL LMA.

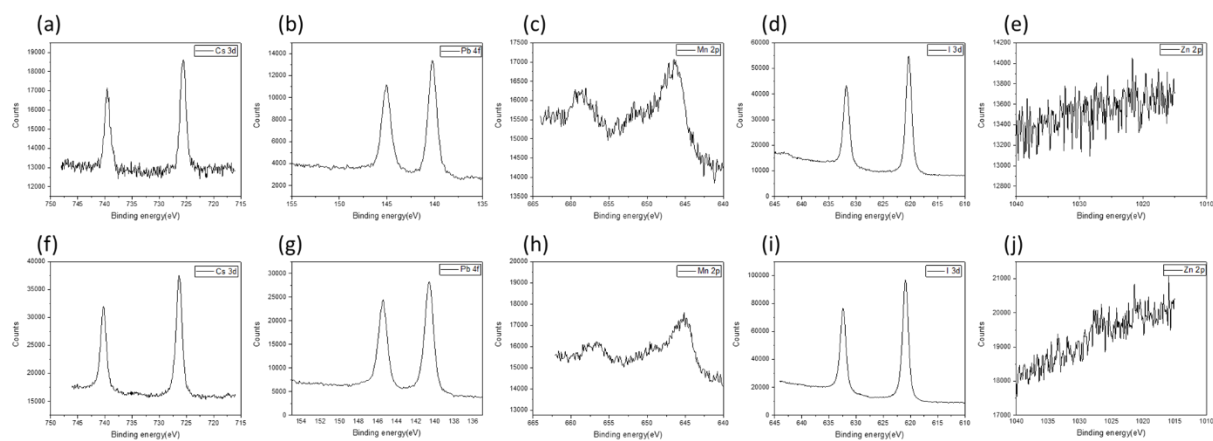

**Fig. S6** XPS spectra of (a) Cs 3d, (b) Pb 4f, (c) Mn 2p, (d) I 3d, (e) Zn 2p for CsPbI<sub>3</sub> QDs through 16 mL LMA and (f) Cs 3d, (g) Pb 4f, (h) Mn 2p, (i) I 3d, (j) Zn 2p for CsPbI<sub>3</sub> QDs through 8 mL LMA.

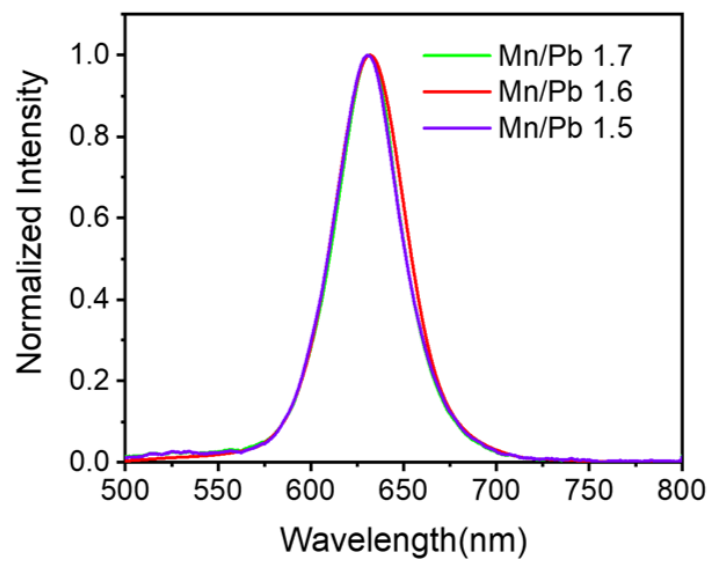

**Fig. S7** (a) PL emission spectra of dilute pristine colloidal QD solution with condition of Mn/Pb=1.5, 1.6 and 1.7.

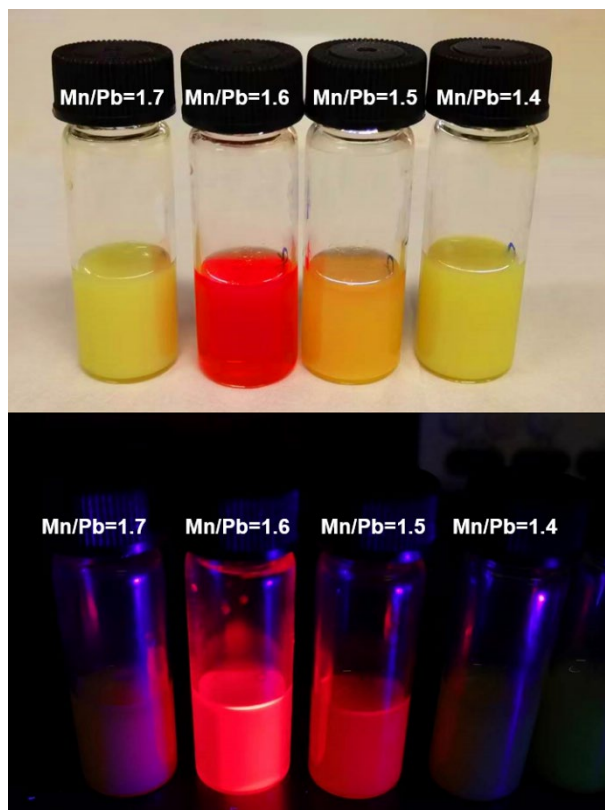

**Fig. S8** Photo images of CsPbI<sub>3</sub> QDs synthesized with different feed ratio of Mn/Pb after purified by methyl acetate for twice under room light and irradiation at 400 nm.

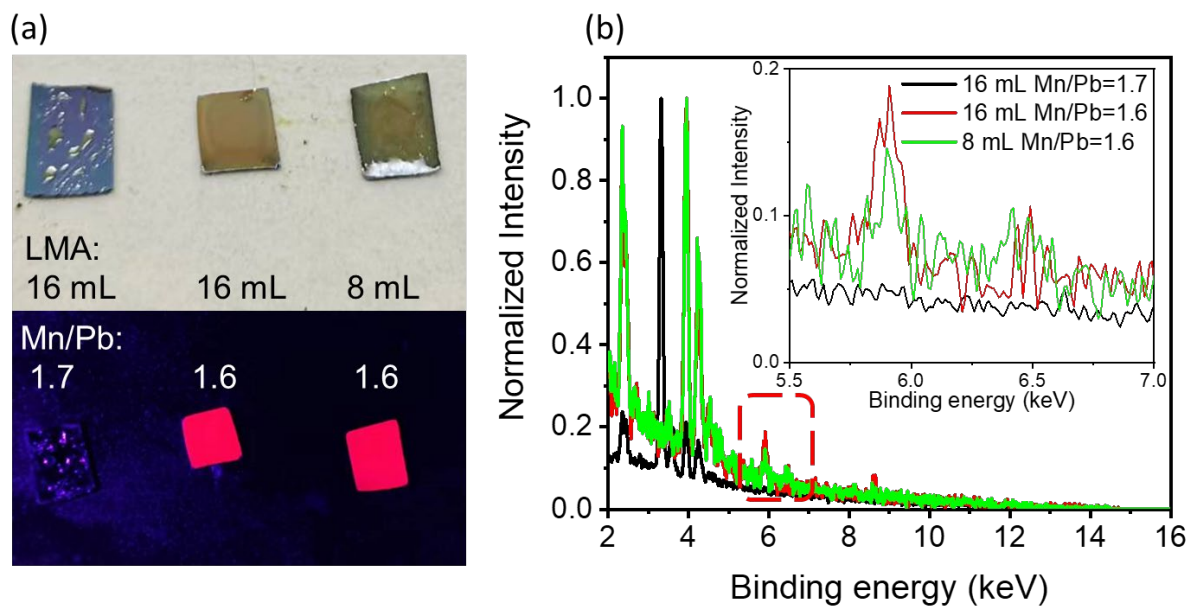

**Fig. S9** (a) Photographs under room light and 400 nm irradiation and (b) EDS spectra of CsPbI<sub>3</sub> QDs with different reaction conditions after purified by methyl acetate. The inset is enlarged part of Mn.

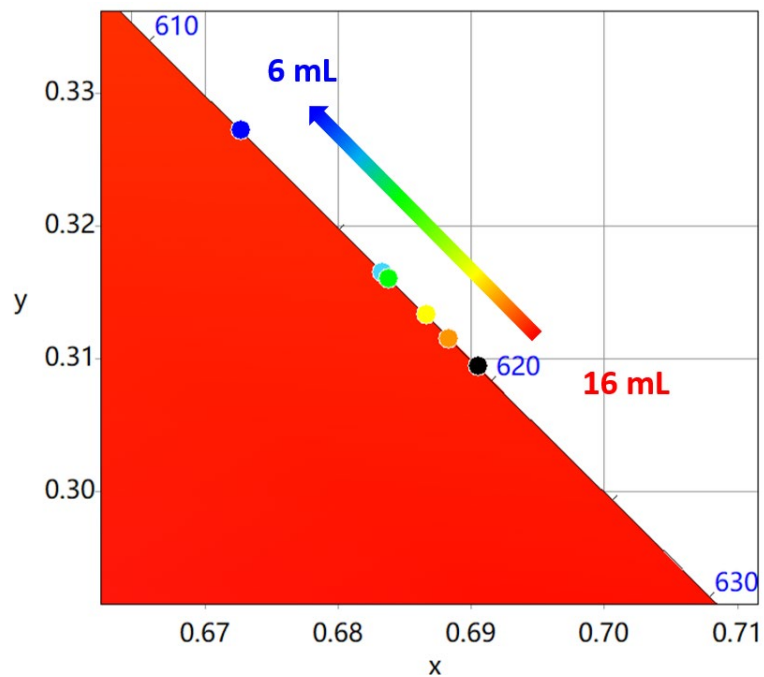

**Fig. S10** Color gamut of the of red CsPbI<sub>3</sub> QD composite films from different amount of LMA in CIE diagram.



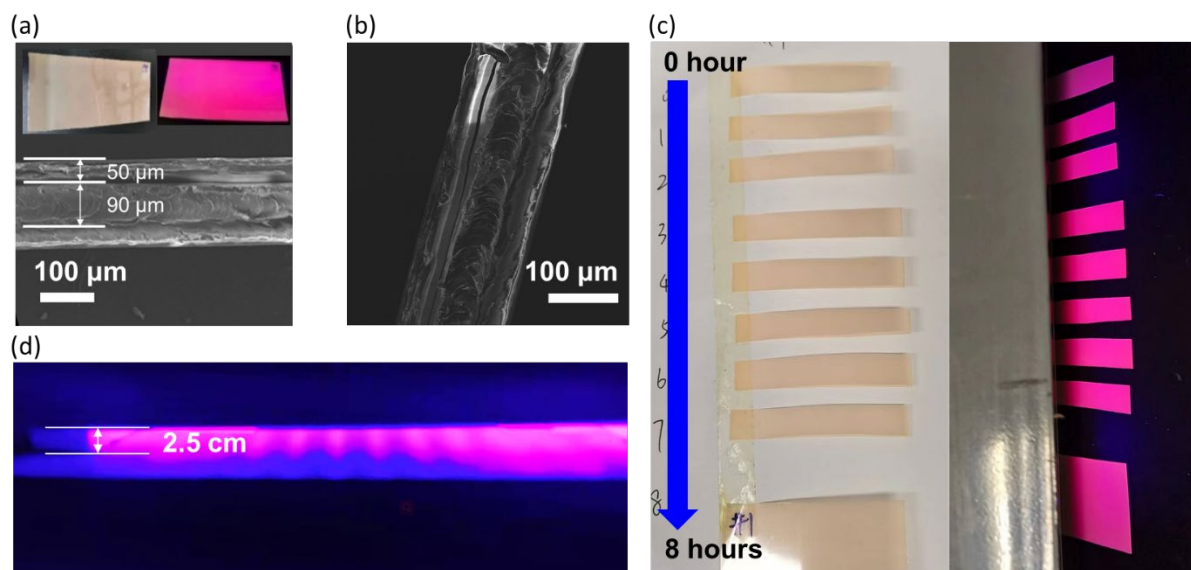

**Fig. S11** SEM characterization displaying the cross section of CsPbI<sub>3</sub> QD composite film (a) before and (b) after continuous irradiation for 8 hours. The insets are photographs of the corresponding films under room light and UV illumination at 365 nm. (c) Photograph of CsPbI<sub>3</sub> QD composite films with different aging time under room light and 365 nm irradiation. (d) Photograph of aging test under home-made 450 nm LED lamp with irradiance of 1750mW/cm<sup>2</sup> in a dark room with a distance of 2.5 cm.

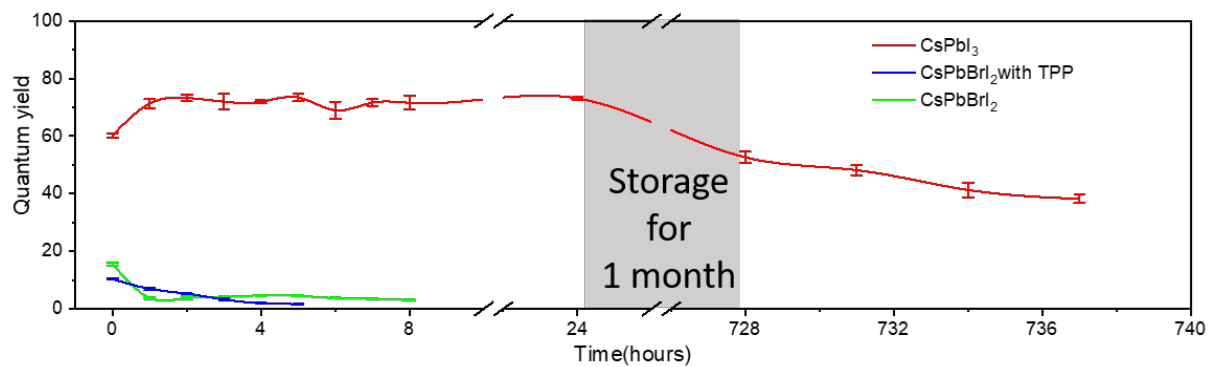

**Fig. S12** Photostability curves of perovskite composite films under illumination evaluated through statistics of absolute PLQY.

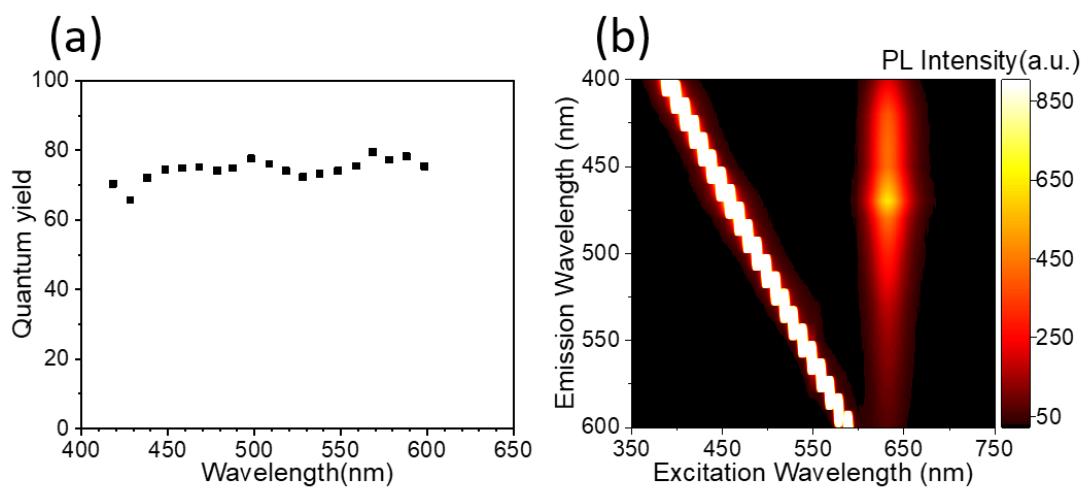

**Fig. S13** (a) PLQY under various excitation wavelength and (b) three-dimensional excitation-emission matrix (EEM) fluorescence spectrum of CsPbI<sub>3</sub> QD film after continuous irradiation for 8 hours.

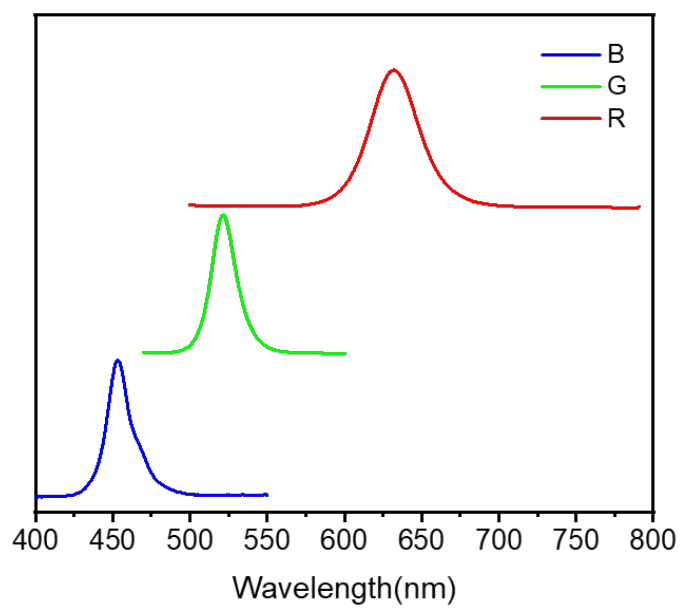

**Fig. S14** PL emission spectra of blue chip, CsPbBr<sub>3</sub> nanocrystal composite film and CsPbI<sub>3</sub> QDs composite film of the LED backlight.

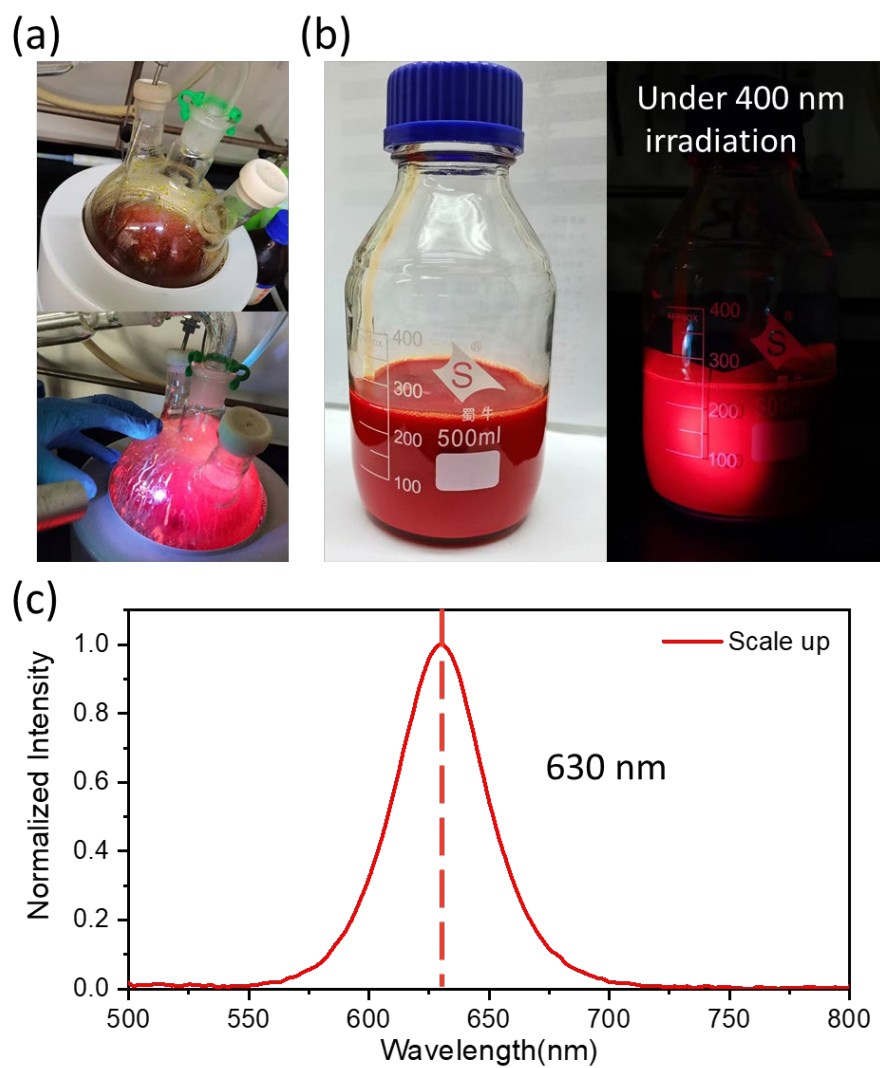

**Fig. S15** Photograph of (a) reaction in 1L round bottom flask and (b) collected QD solution. (c) PL emission spectra of dilute pristine CsPbI<sub>3</sub> QDs through scale up method.
